# Supplementary material
Source: publisher figshare collection journal article supplement (https://frontiersin.figshare.com/ndownloader/files/35495915)
Supplement: Supplementary file 1 [file 35495915]

Supplementary Material

# Field measurements

## Device for sediment sampling

A rod of 145 cm was connected to the bottom of the stream at one end, while a float at the upper side was always at maximum water level. Along the rod inlet tubes were connected at 25% and 75% of the rod length, which correspond with the same ratio of the water depth (figure C.1-D). The two inlet tubes were combined into one sample before reaching the ISCO. This design was adapted from Gettel et. al. (2011) and Eads and Thomas (1983) (Gettel et al. 2011; Eads and Thomas 1983) and was estimated to have TSS samples with an error < 10% (Gettel et al. 2011).

## Rainfall and runoff analysis

To compare rainfall events with each other the event index (EVI) was calculated (Baartman et al. 2013). This combines rainfall intensity, duration, and total amount of precipitation to reflect the impact of the event:

*EVI = (PImax * Ptot) / D (S.1)*

With PImax being the maximal 1 min rainfall intensity (mm h-1), Ptot the total rainfall in mm and D the duration of the event in minutes. A high EVI reflects a relatively short event with higher intensities and total amount of rainfall.

**A**

**B**


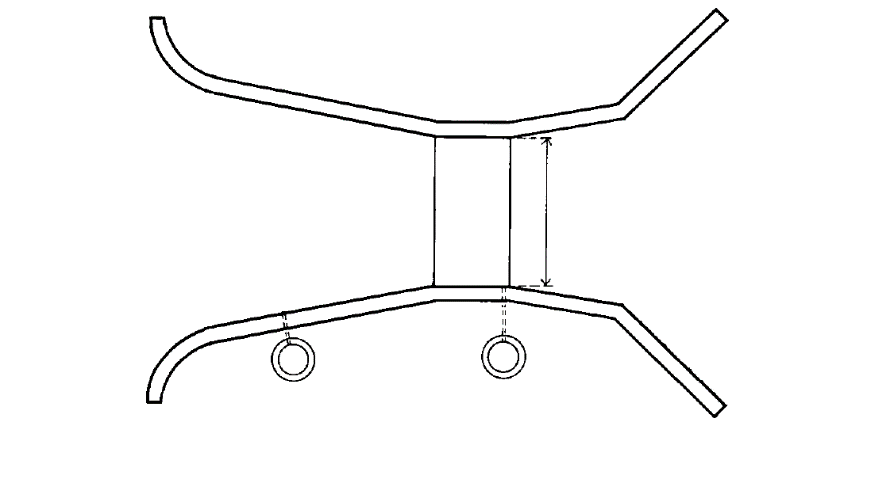

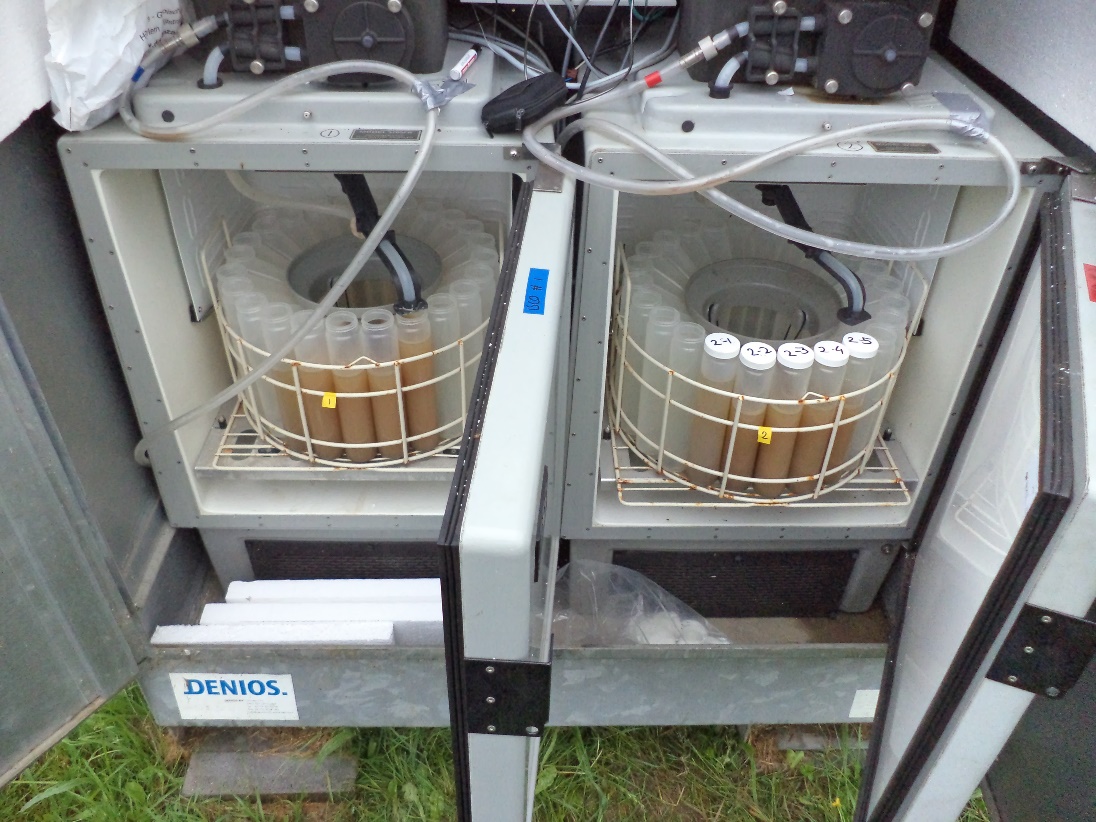


4.2

4.1

∆H

4.3


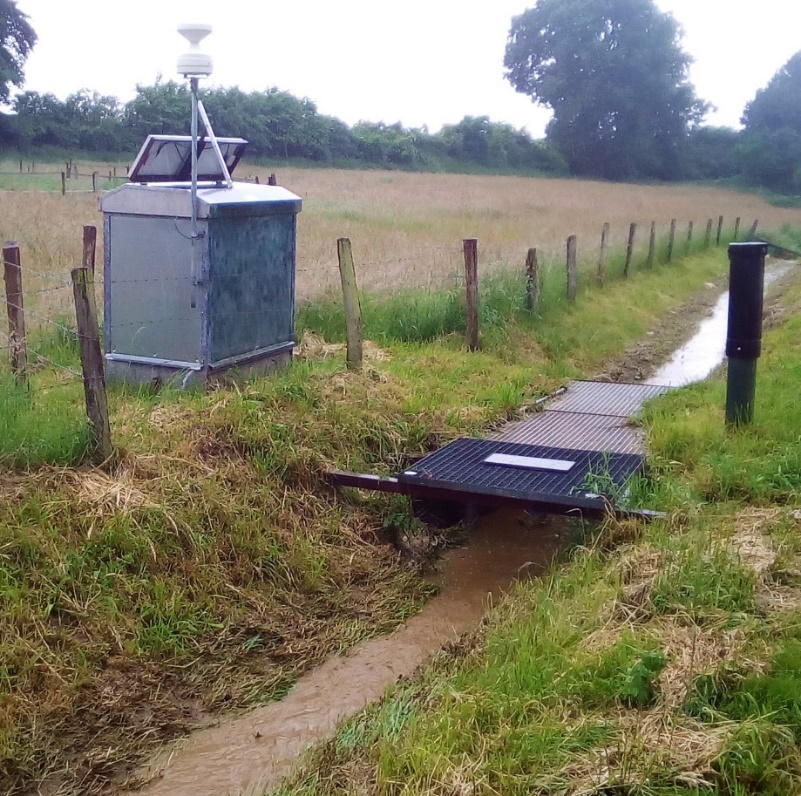


**1**

6

7

5

5

1

3

2

2

4

6

**C**

**D**

4

3

Figure S.1: Overview of the measurements at the catchment outlet. A. Photo with stream flow during event of 2019-05-28, B. Top view of outlet and installed equipment, C. ISCO automatic sampler with 5 samples collected, D. Side view of inlet device for runoff sampling with: 4.1 = Float, 4.2 = inlet tubes on 25 and 75% of water depth (∆H), 4.3 = ground anker with pivot on stream bed. The indicated equipment is: 1 = Equipment unit including ISCO automated samplers, batteries and datalogger, 2 = tipping bucket rain gauge, 3 = Solar panel, 4 = Runoff sampling inlet device, 5 = Parshall flume with 2 feet throat width, 6 = Water level sensor upstream (Ha), 7 = Water level sensor downstream (Hb).

Measured discharge was calculated based on the water height measured in the Parshall flume. The water level was measured on 2 locations (ha and hb), the ratio between both is an indicator for the level of submergence. When the submergence relation is below 50%, free flow conditions were met and the discharge can be calculated with equation 2 (Parshall 1926), note that these formulae are in feet, while collected data is in metric units:

*Q = 1.428 * ha1.550  (S.2)*

When free flow conditions were not met the discharge was corrected for submergence. With the ha/hb approaching 100% the accuracy of the flume starts to decrease substantially. Correction of discharge is done with:

*Q = Qfree – Qcor  (S.3)*

With *Qfree* the discharge based on the free flow formula (eq. 2) and *Qcor*:

where *ha*is the upstream water head in feet, *hb* is downstream water head in feet, *w* is the flume throat width in feet, *K* is *hb/ha*, *Q* is the discharge in f3 s-1 when *K* < 0.5 and *Qcor* the discharge correction when *K* > 0.5.

Total suspended solids (TSS) were calculated based on an empirical relation derived for the sampling boom and ISCO samplers, specific for loess soils:

*TSS = S / 0.951 (S.5)*

were *TSS* is in g L-1, *S* is sample concentration of *TSS* in g L-1. The correlation coefficient of the derived formula is 0.99 (sd ± 7%).

*Events selected for further analysis*

During the measurement years 2019 and 2020, based on the discharge data from the flume, 39 runoff events occurred. From these, 25 events were also sampled by the ISCO automatic sampler. The 14 missed events were not included due to temporary malfunctioning of the measurement setup. For 17 of the 25 events, pesticide analysis was done. Five events were not analyzed because the samples were not stored cold enough until analysis, and for 3 events the total collected sediment by the samplers was too low (< 4 gr) to perform a pesticide analysis. Three other events were excluded from further analysis because event duration was much longer than 72 minutes, which is the maximal sampling time for the automatic samplers. Thus, eventually 14 events were considered for the analysis of this study.

The subsets of analyzed and not-analyzed events are compared on runoff and erosion characteristics. No significant differences (p < 0.05) were found between the groups. In Figure S.2 a comparison for six characteristics is presented. The boxplots show a tendency for shorter, more intense events with higher median TSS and total erosion in the analyzed subset. This can be explained by limitations in the observation and measurement design; the maximal duration of sampling was 72 minutes, events which lasted much longer had to be excluded from analysis. Besides that, the sediment for pesticide analysis was collected from 800 mL discharge samples. Events with low TSS values therefor could not be included in the analysis. This trend will influence the results by presenting an overestimation of erosion, and analyzing events which caused more sediment and hydrologic dynamics in the catchment.


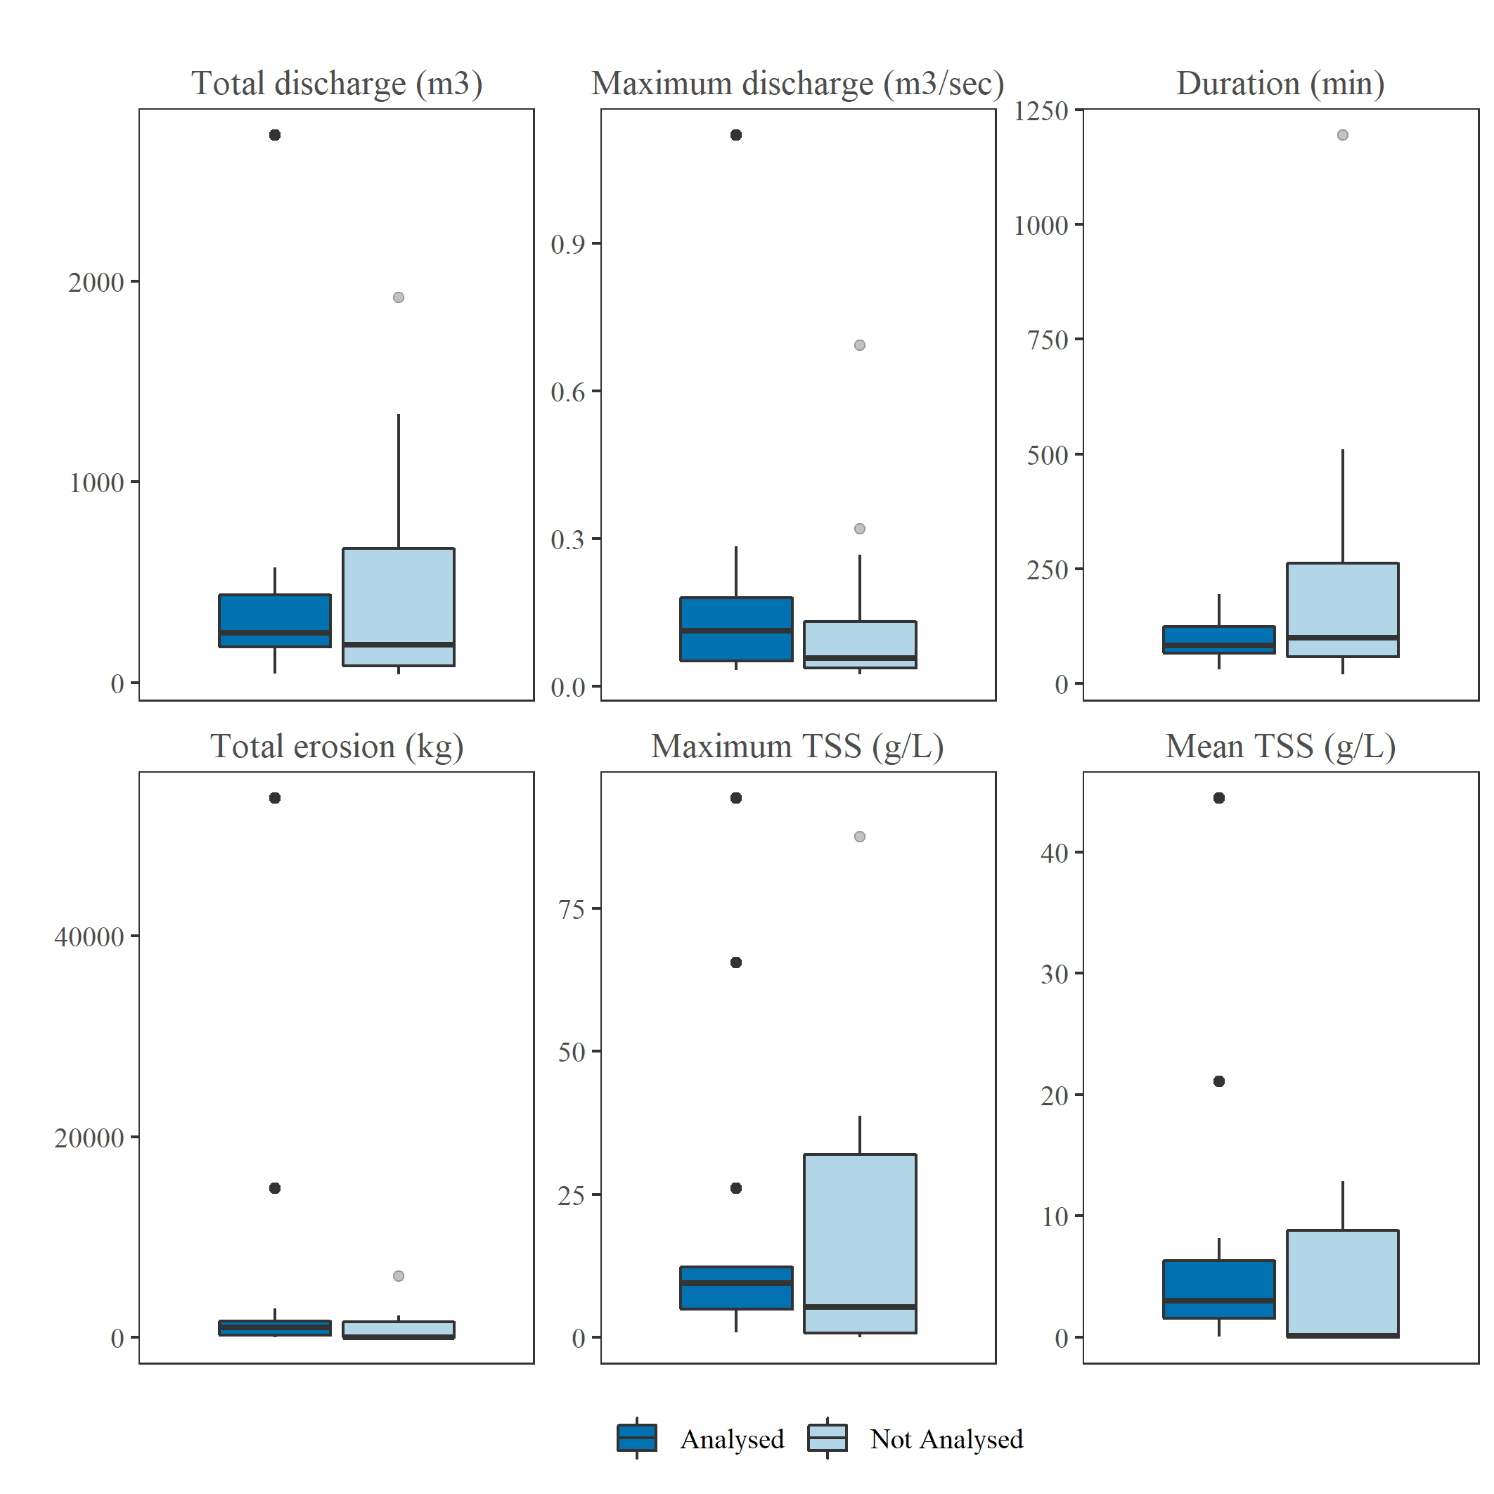


Figure S.2: comparison of runoff and erosion statistics between analyzed and not-analyzed events during the observation period. No significant differences are found (p = 0.05). Of 39 events, one (2019-08-18) is excluded due to errors in the sensor on water level readings. For discharge; analysed n = 14, not-analyzed n = 24. For erosion and TSS; analyzed n = 14, not-analyzed n = 9. For 14 events no TSS data was collected.

# Pesticides applied, selected and analyzed

From the landowners of the fields A, B and, C the pesticide application data was obtained. In total 58 different active substances (AS) were applied during the study period. Table S.1 shows all the substances with chemical characteristics and whether they were selected for analysis during this study.

Table S.1: overview of applied and analyzed active substances.

| **AS** | **DT50** | **Kf** | **Kfoc** | **Sw** | **type** | **analyzed** |
| --- | --- | --- | --- | --- | --- | --- |
| Chlorantraniliprole | 204 | 2.95 | 301 | 0.88 | insecticide | Yes |
| Iodosulfuron-methyl-sodium | 3.2 | 0.82 | 45 | 25000 | herbicide | No |
| Mesosulfuron-methyl | 78 | 1.27 | 92 | 483 | herbicide | No |
| Thiencarbazon-methyl | 17 | 2.01 | 100 | 436 | herbicide | No |
| Bixafen | 254 | 62.5 | 3869 | 0.49 | fungicide | Yes |
| Prothioconazole | 0.77 | 44.2 | 2556 | 22.5 | fungicide | Yes |
| Boscalid | 254 | 12.6 | 772 | 4.6 | fungicide | Yes |
| Pyraclostrobin | 33.3 | 145 | 9315 | 1.9 | fungicide | Yes |
| Lenacil | 39.8 | 2.39 | 130 | 2.9 | herbicide | No |
| Desmedipham | 8 | 45.22 | 4124 | 5.6 | herbicide | No |
| Phenmedipham | 16.7 | 20.22 | 1142 | 1.8 | herbicide | No |
| Metamitron | 11.1 | 1.09 | 86.4 | 1770 | herbicide | No |
| Prosulfocarb | 9.8 | 23.1 | 1693 | 13.2 | herbicide | Yes |
| Thiacloprid | 8.1 | 4.41 | 615 | 184 | insecticide | Yes |
| Acequinocyl | 0.1 | NA | NA | 0.007 | insecticide | No |
| Pyroxsulam | 13 | 0.519 | 28.31 | 3200 | herbicide | No |
| Florasulam | 8.5 | 0.45 | 20.37 | 6360 | herbicide | No |
| Clomazone | 27.3 | 2.08 | 128.3 | 1212 | herbicide | No |
| Metribuzin | 19 | 0.874 | 48.3 | 10700 | herbicide | Yes |
| Glyphosate | 23.79 | 226.3 | 16331 | 10500 | herbicide | Yes |
| Cyflufenamid | 25.3 | 28.5 | 1592 | 0.52 | fungicide | Yes |
| Deltamethrin | 21 | 17500 | 10240000 | 2.00E-04 | insecticide | No |
| Dithianon | 35 | NA | NA | 0.22 | fungicide | No |
| S-metolachlor | 23.17 | 3.63 | 200.2 | 480 | herbicide | No |
| Spirodiclofen | 7.3 | NA | NA | 0.05 | insecticide | No |
| Pyrimethanil | 31.4 | 8.38 | 355.7 | 110 | fungicide | Yes |
| Trifloxystrobin | 1.69 | 43.5 | 2287 | 0.61 | fungicide | Yes |
| Acetamiprid | 3 | 1.58 | 106.5 | 2950 | insecticide | Yes |
| Quinmerac | 9.8 | 0.59 | 86 | 107000 | herbicide | No |
| Fluopicolide | 138.8 | 4.2 | 321.1 | 2.8 | fungicide | Yes |
| Propamocarb | 14 | NA | NA | 900000 | fungicide | Yes |
| Lambda-cyhalothrin | 26.9 | 4167 | 290311 | 0.005 | insecticide | No |
| 2.4-D | 28.8 | NA | NA | 24300 | herbicide | No |
| Captan | 3.7 | NA | NA | 5.2 | fungicide | No |
| Bupirimate | 34 | 46 | 1882 | 13.06 | fungicide | No |
| Diquat | 5500 | 23099 | 1078792 | 718000 | herbicide | No |
| Diquatdibromide | 5500 | 1740 | 78274 | 718000 | herbicide | No |
| Difenoconazole | 91.8 | 41 | 3760 | 15 | fungicide | Yes |
| Epoxiconazole | 97.7 | 12.2 | 894 | 7.1 | fungicide | Yes |
| Ametoctradin | 19.7 | NA | NA | 0.15 | fungicide | No |
| Dimethomorph | 44 | 6.07 | 419.4 | 28.95 | fungicide | Yes |
| Metconazole | 134.7 | 23.05 | 1116 | 30.4 | fungicide | No |
| Mancozeb | 0.05 | 9.7 | 771 | 6.2 | fungicide | No |
| Metobromuron | 22.4 | 3.87 | 160 | 328 | herbicide | Yes |
| Cyazofamid | 4.5 | 23 | 1338 | 0.107 | fungicide | Yes |
| Mandipropamid | 13.6 | 16.1 | 847 | 4.2 | fungicide | Yes |
| Cymoxanil | 3.5 | 0.302 | 19.6 | 780 | fungicide | Yes |
| Isopyrazam | 72 | 30.3 | 2416 | 0.55 | fungicide | Yes |
| Fluxapyroxad | 181.5 | 8.3 | 728 | 3.44 | fungicide | Yes |
| Carfentrazone-ethyl | 0.5 | 7.08 | 486.04 | 29.3 | herbicide | Yes |
| Indoxacarb | 5.79 | NA | NA | 0.2 | insecticide | Yes |
| Esfenvalarate | 19.2 | NA | NA | 0.001 | insecticide | No |
| Dodine | 13.3 | NA | NA | 930 | fungicide | Yes |
| Flutolanil | 105 | 11.03 | 735 | 8.01 | fungicide | Yes |
| Flonicamid | 3.1 | NA | NA | 5200 | insecticide | Yes |
| Triclopyr | 30 | 1.017 | 57.95 | 8100 | herbicide | No |
| Oxathiapiprolin | 71.3 | 79.1 | 6242.6 | 0.1749 | fungicide | Yes |
| Mcpa | 25 | 0.94 | 74 | 29390 | herbicide | No |
| Units: DT50: days, kf: ml g-1, kfoc: ml g-1, Sw: mg l-1 | | | | | | |

Analysis for glyphosate and AMPA was done following the procedure described by Yang et al. (2015a) and Bento et al. (2018) (Bento et al., 2018; Yang et al., 2015). Glyphosate and AMPA were extracted from 2 g of soil or sediment by adding 10 mL, 0.6 M KOH. For TSS samples with <2 gr available, the extraction procedure was done with 1 gr of material and 5 mL, 0.6 M KOH. The mixtures were shaken (end-over-end) for 1 hour, and then centrifuged (15 minutes, 3500 rpm). 1 mL of the supernatant was transferred to a new tube and 80 µL HCl 6 M was added to adjust the pH. Runoff water samples were included from this step onward in the preparation. All samples were spiked with 40 µL GLY/AMPA Isotope labelled internal standard 5 µg mL-1. 500 µL borate buffer 5% and 500 µL FMOC-CL 6.5 mM (9-fluorenylmethoxycarbonyl chloride; derivatisation agent) were added. The tubes were vortexed. After 30 minutes the reaction was stopped by adding 50 µL formic acid (98-100%) to the tube and vortexing. 500 µL of the extract was transferred to a filter vial to be analysed with LC-MS/MS with electrospray ionization (ESI) in negative mode.

The multi residue analysis was done according to Silva et.al (2019), the QuEChERS approach was used for soil and sediment samples (Anastassiades et al. 2003; Mol et al. 2008). The sediment (TSS in runoff) and soil samples were thawed on the morning of extraction. 25 µL of 13C3-caffeine 10 µg mL-1 was added to all samples as an internal standard, after which 5 mL Millipore water and 10 mL acetonitrile containing 1% acetic acid (ACN 1% HAc; extraction solvent) were added and the mixture was shaken (end-over-end) for 30 minutes. Next, 1 gr sodium acetate and 4 gr magnesium sulphate were added to induce a phase separation and the tube was vortexed and centrifuged (5 min, 3500 rpm). For analysis using LC-MS/MS with ESI) in positive mode, 125 µL supernatant, 125 µL ACN 1% HAc and 250 µL Millipore water were combined into a LC filter vial and vortexed. For runoff water samples, no extraction was needed. 2000 µL water sample, 1950 µL ACN 1% HAc and 50 µL of 13C3-caffeine 10 µg mL-1 were combined and vortexed, from this tube 500 µL was transferred to a LC filter vial for LC-MS/MS analysis. The analysis was done with a LC-MS/MS system consisting of an Acquity UPLC system and a TQS triple quadrupole mass spectrometer, both from Waters (Milford, MA, USA). A HSS T3 UHPLC (1.8 µm, 2.1x100 mm) column (Waters) was used. Eluents consisted of water (A) and methanol:water (95:5) (B), both containing 0.1% formic acid and 5 mM ammonium formate. See table S.2 for the gradient used.

Table S.2: LC gradient

| **Time [min.]** | **% Eluent A** | **% Eluent B** |
| --- | --- | --- |
| 0 | 100 | 0 |
| 1 | 100 | 0 |
| 2.5 | 55 | 45 |
| 8.5 | 0 | 100 |
| 11.5 | 0 | 100 |
| 12 | 100 | 0 |
| 14 | 100 | 0 |

Flow rate was 400 µl/min., the column was used at a temperature of 40° and the injection volume was 5 µl. See table S.3 for the parameters used for the electrospray source:

Table S.3: Source parameters

| **Parameter** | **Value** |
| --- | --- |
| Polarity | Positive |
| Capillary | 3 kV |
| Source Offset | 50 V |
| Source Temperature | 150 °C |
| Desolvation Temperature | 450 °C |
| Cone gas Flow | 150 L/hr |
| Desolvation Gas Flow | 1000 L/hr |
| Nebuliser Gas Flow | 7 Bar |
| Collision Gas Flow | 0.17 mL/min. |

For each compound (except the internal standard) two MS/MS transitions were analyzed. See table S.4 for the details of the MS/MS transitions used.

Table S.4: MS/MS parameters

| **Compound** | **Quantifier** | | | | **Qualifier** | | | |
| --- | --- | --- | --- | --- | --- | --- | --- | --- |
|  | **P** | **D** | **Cone [V]** | **CE [V]** | **P** | **D** | **Cone [V]** | **CE [V]** |
| Propamocarb | 189.0 | 102.0 | 30 | 14 | 189.0 | 144.0 | 30 | 14 |
| Flonicamid | 230.0 | 203.0 | 25 | 17 | 230.0 | 174.0 | 25 | 17 |
| Caffeine-13C | 198.0 | 140.0 | 20 | 20 |  |  |  |  |
| Acetamiprid | 223.2 | 126.1 | 30 | 20 | 225.0 | 128.0 | 30 | 20 |
| Thiacloprid | 253.0 | 126.0 | 30 | 20 | 255.0 | 128.0 | 30 | 20 |
| Cymoxanil | 199.0 | 127.9 | 18 | 8 | 199.0 | 110.9 | 18 | 18 |
| Metribuzin | 215.0 | 74.0 | 30 | 30 | 215.0 | 84.0 | 30 | 30 |
| Mesosulfuron-methyl | 504.1 | 182.1 | 30 | 25 | 526.1 | 370.9 | 30 | 22 |
| Trinexapac-ethyl | 253.0 | 69.0 | 20 | 18 | 253.0 | 207.0 | 20 | 18 |
| Chlorantraniliprole | 484.0 | 285.9 | 20 | 10 | 482.0 | 283.9 | 20 | 10 |
| Pyrimethanil | 200.1 | 106.9 | 34 | 22 | 200.1 | 82.0 | 34 | 23 |
| Mandipropamid | 412.0 | 328.0 | 15 | 15 | 412.0 | 356.0 | 15 | 12 |
| Terbuthylazine | 230.0 | 174.0 | 25 | 15 | 232.0 | 176.0 | 25 | 15 |
| Oxathiapiprolin | 540.0 | 500.0 | 25 | 23 | 540 | 167 | 25 | 23 |
| Boscalid | 343.0 | 307.0 | 35 | 15 | 343.0 | 140.0 | 35 | 15 |
| Flutolanil | 324.2 | 242.1 | 27 | 25 | 324.2 | 262.1 | 27 | 17 |
| Dimethomorph | 388.0 | 301.0 | 30 | 25 | 388.0 | 165.0 | 30 | 25 |
| Fluopicolide | 383.0 | 173.0 | 30 | 25 | 383.0 | 145.0 | 30 | 50 |
| Cyazofamid | 325.0 | 107.9 | 26 | 20 | 327.0 | 107.9 | 26 | 10 |
| Prothioconazole desthio- | 312.0 | 70.0 | 25 | 21 | 314.0 | 70.0 | 25 | 21 |
| Epoxiconazole | 330.1 | 120.9 | 25 | 22 | 332.1 | 120.9 | 25 | 22 |
| Bixafen | 414.0 | 394.0 | 30 | 15 | 416.0 | 396.0 | 30 | 15 |
| Carfentrazone-ethyl | 412.0 | 345.8 | 30 | 20 | 412.0 | 365.7 | 30 | 17 |
| Dodine | 228.0 | 71.0 | 35 | 20 | 228.0 | 186.0 | 35 | 20 |
| Prothioconazole | 344.1 | 326.0 | 12 | 10 | 344.1 | 125.0 | 12 | 28 |
| Pyraclostrobin | 388.3 | 193.9 | 30 | 12 | 388.3 | 162.9 | 30 | 25 |
| Cyflufenamid | 413.0 | 295.0 | 25 | 15 | 413.0 | 241.0 | 25 | 15 |
| Difenoconazole | 406.0 | 251.0 | 30 | 25 | 408.0 | 253.0 | 30 | 25 |
| Isopyrazam | 360.0 | 244.0 | 30 | 22 | 360.0 | 320.0 | 30 | 22 |
| Indoxacarb | 528.1 | 249.1 | 35 | 18 | 528.1 | 217.9 | 35 | 18 |
| Ametoctradin | 276.0 | 149.0 | 45 | 37 | 276.0 | 176.0 | 45 | 37 |
| Trifloxystrobin | 409.2 | 186.0 | 20 | 17 | 409.2 | 206.1 | 20 | 15 |
| Prosulfocarb | 252.0 | 91.0 | 25 | 25 | 252.0 | 86.0 | 25 | 15 |

| **Glyphosate and AMPA analysis** | | | | | | | | |
| --- | --- | --- | --- | --- | --- | --- | --- | --- |
| **Compound** | **Quantifier** | | | | **Qualifier** | | | |
|  | **P** | **D** | **Cone [V]** | **CE [V]** | **P** | **D** | **Cone [V]** | **CE [V]** |
| Glyphosate-FMOC | 390.2 | 168.1 | 20 | 12 | 390.2/ 390.2 | 150.2/ 124.2 | 20/ 20 | 24 / 28 |
| AMPA-FMOC | 332.2 | 110.2 | 20 | 6 | 332.2 | 136.1 | 20 | 14 |
| 1, 2–13C 15N Glyphosate-FMOC | 393.2 | 171.1 | 20 | 12 | - | - | - | - |
| 13C 15N AMPA-FMOC | 334.2 | 112.2 | 20 | 6 | - | - | - | - |

The limit of quantification (LOQ) for the different analysis and sample materials is shown in table S.5.

Table S.5: Overview of limits of quantification for different analysis types and sample materials.

| Analysis | Sample material | LOQ (ppb*) |
| --- | --- | --- |
| Glyphosate/AMPA | Runoff water | 10 |
| Runoff TSS and soil | 50 |
| Multi-residue (individual compounds) | Runoff water | 2.5 |
| Runoff TSS and soil | 10 |
| *ppb equals µg L-1 for water and µg kg-1 for soil and sediment | | |

## Response analysis

Linear response of each calibration standard was tested against the 3.125 ng mL-1 standards. If the response deviated more than 20% the standard was not included in the linear model. The linear range of each compound per sequence was limited to the minimal and maximal standards that had a linear response. The correlation coefficients for the fitted linear models were all above 0.98. Samples were evaluated on quality based on the ion ratio (±30% from mean of standards) and retention time (± 0.05 minutes from mean of standards). If the sample response was outside the linear range for a compound, a dilution was made and reanalysed. Dilutions had to be made for 97 out of 175 samples consisting of 8 runoff water samples, 47 TSS in runoff and 42 soil samples in the catchment. Dilution factors ranged from 4 times up to 1000 times. This indicates the high variety in concentrations found in the samples.

For prothioconazole the sum of prothioconazole and desthio-prothioconazole, expressed as prothioconazole, is reported because this transformation product can be formed both in nature and during the analysis.

***LOQ analysis***

To derive total pesticide load in runoff water and TSS, the pesticide measurements below limit of quantification (LOQ), were assumed to be zero (0). For sediment this does not introduce a significant error because the measured concentrations were much higher than LOQ, however for water the potential pesticide load that is not accounted for can be significant. To estimate this difference, the maximal undiscovered pesticide load in water (*Pwmax*) was derived by calculating the total load with LOQ concentrations for each compound that was also detected in TSS during the same event. This statistic gives an added indication of uncertainty in the presented total loads of pesticides in runoff water.

## Point source pollution by Glyphosate

The main pesticide source during the events in this study are the agricultural fields. For these diffuse pollution sources, relations can be found between field application, detected AS in the soil and measured concentrations in DP and PP at the outlet. However, the high concentrations of glyphosate detected in the runoff event of 2020-09-23 cannot be explained by the applications of glyphosate on the three main fields. A possible usage of glyphosate in the month September is related to the preparation of fields for the winter cover crop after cereals cultivation when using minimum tillage (Schappert et al. 2018; Griffin and Dabney 1990). At the borders of the catchment, there were eight other fields cultivated with cereals in the growing season of 2020. Spillage and point source losses of pesticides at field borders can contribute to pollution (Reichenberger et al. 2007; Wenneker et al. 2010; Moser et al. 2018; Syafrudin et al. 2021) and in this case such a point source is the most likely explanation of the high concentrations detected. The point source pollution was suggested by one of the landowners during an interview. The point source would be located on the tarmac road bordering the apple orchard, and was a result of spilling the left-over of a field treatment on the road. These extreme concentration peaks due to point source pollution in runoff pose a threat to the environment which is not detected when long term averages are studied (Boxall et al. 2013; Hamer, Maynard, and Schneider 2019).

In table S.6 the concentrations and transported load of Glyphosate and its metabolite AMPA are presented. On 23-09-2020 the concentrations and resulting transported loads in PP and DP are extremely high compared to concentrations detected in other events and for other AS (see also figure 3).

Table S.6: concentrations and transported load of Glyphosate and AMPA in the three events influenced by the point source pollution.

| Date | Glyphosate | | | | AMPA | | | |
| --- | --- | --- | --- | --- | --- | --- | --- | --- |
| PP | | DP | | PP | | DP | |
| mg kg-1 | load (g) | mg L-1 | load (g) | mg kg-1 | load (g) | mg L-1 | load (g) |
| 23-09-2020 | 566 | 11 | 2.2 | 134.8 | 23.6 | 0.5 | 0 | 0 |
| 08-10-2020 | 2.9 | 3 | 0.003 | 12.5 | 2.4 | 2.8 | 0 | 0 |
| 22-10-2020 | 1.2 | 2 | 0.001 | 2.6 | 1.9 | 3.4 | 0.0001 | 0.6 |

# Propagation of uncertainty

The calculations of the total pesticide loads in particulate (PP) and dissolved phase (DP) were based on variables that each introduce uncertainty towards the final quantification. Propagation of uncertainty was calculated with the standard deviation expressed as relative error for each variable (Taylor and Thompson 1998). The use of relative error was chosen because for most of the primary measurements (Qw and TSS) the expected error will be relative to the absolute value and not fixed independently. Moreover, propagation of uncertainty in cases of multiplication is better performed on relative errors.

For precipitation and discharge measured in the Parshall flume the uncertainty was obtained from literature. The accuracy of the Parshall flume was improved by using a correction formula, see Annex C for more explanation. Total suspended sediment was calibrated in the laboratory for this research. The prediction error of the fitted model was 6%.

For the pesticide analysis, the uncertainty was based on the variation detected in the quality control samples. The variation in recovery and detected concentration is used as indication for the uncertainty of the whole chemical analysis including extraction, matrix effect and random variation during analysis. To take a conservative uncertainty estimate, the largest standard deviation among the compounds was applied to the whole study. The correction for VWC was based on a model fitted based on the relation between volumetric water content in the collected samples and estimated water content of the material used for LC-MS/MS analysis.

Propagation of uncertainty was calculated using:

*( S.6)*

where is the relative error of the calculated variable and etc. are the relative errors of the used variables.

The relative standard deviation was calculated with:

*( S.7)*

The resulting uncertainties are presented in table S.6.

Table S.7: Uncertainty and propagation of errors for major variables to derive total pesticide load in DP and PP.

| Variable | Unit | Estimated uncertainty | Calculations and propagation |
| --- | --- | --- | --- |
| Precipitation: P | mm h-1 | Tipping bucket: ± 4% at 25 mm h-1 (Parkin, King, and Shaw 1982) | Calibration showed mean of 0.203 mm (This research) |
| Water discharge: Q | m3 sec-1 | K < 0.7 ± 3%, K > 0.7 ± 5% (Bos 1989; Parshall 1926) | See Annex C for Q corrections |
| TSS | g L-1 | ± 3% (This research) | RMSE from model fit |
| Sediment discharge: Qsed | kg sec-1 | ± 6% | Eq. B.1 with *a = Q* and *b = TSS* |
| Pesticide concentration | ppb | ± 16% (This research) | Max σ compound recovery |
| VWC correction | % | ± 6% (This research) | RMSE from model fit |
| Pesticide load water | mg | ± 17% | Eq B.1 with *a = Q* and *b = Pest_conc_water* |
| Pesticide load sediment | mg | ± 18% | Eq B.1 with *a = Qsed, b = Pest_conc_sed* and *c = VWC_cor* |
| Note: all uncertainties are given as the relative standard deviation of the given variable. | | | |

# Additional results

## Images of runoff from different landuse types


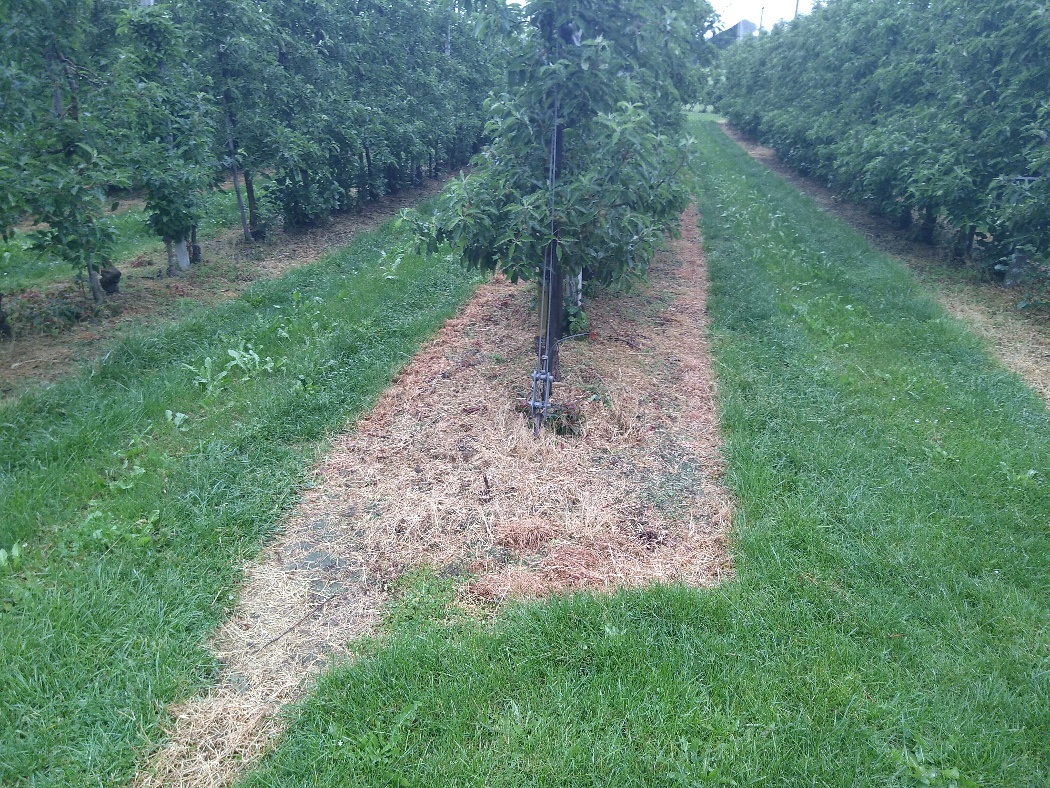


Figure S.3: Photo of the apple orchard during rainfall event on 28 May 2019. The grass cover prevents erosion and high amounts of runoff. The dead vegetation around the tree lines is the results of herbicide applications.


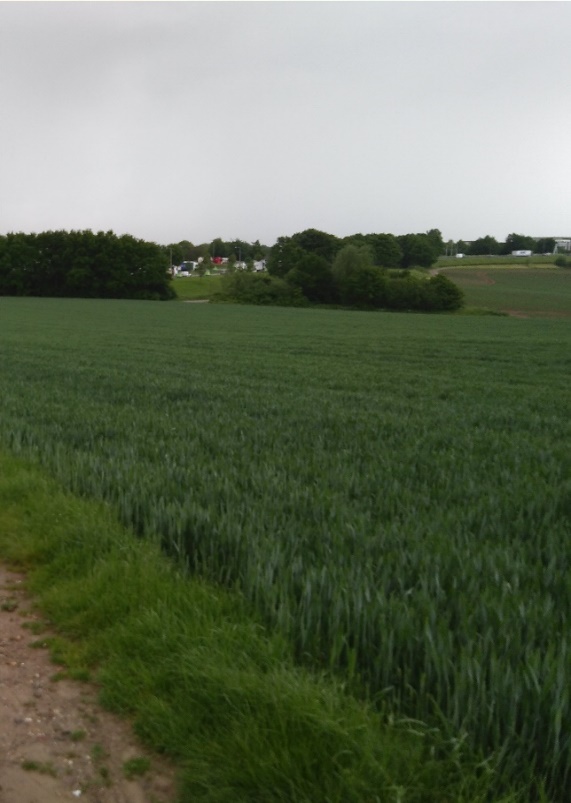


Figure S.4: Photo of the cereals field during rainfall event on 28 May 2019. The dense cover prevents runoff and erosion. Alongside the road a tipping bucket with datalogger is installed.


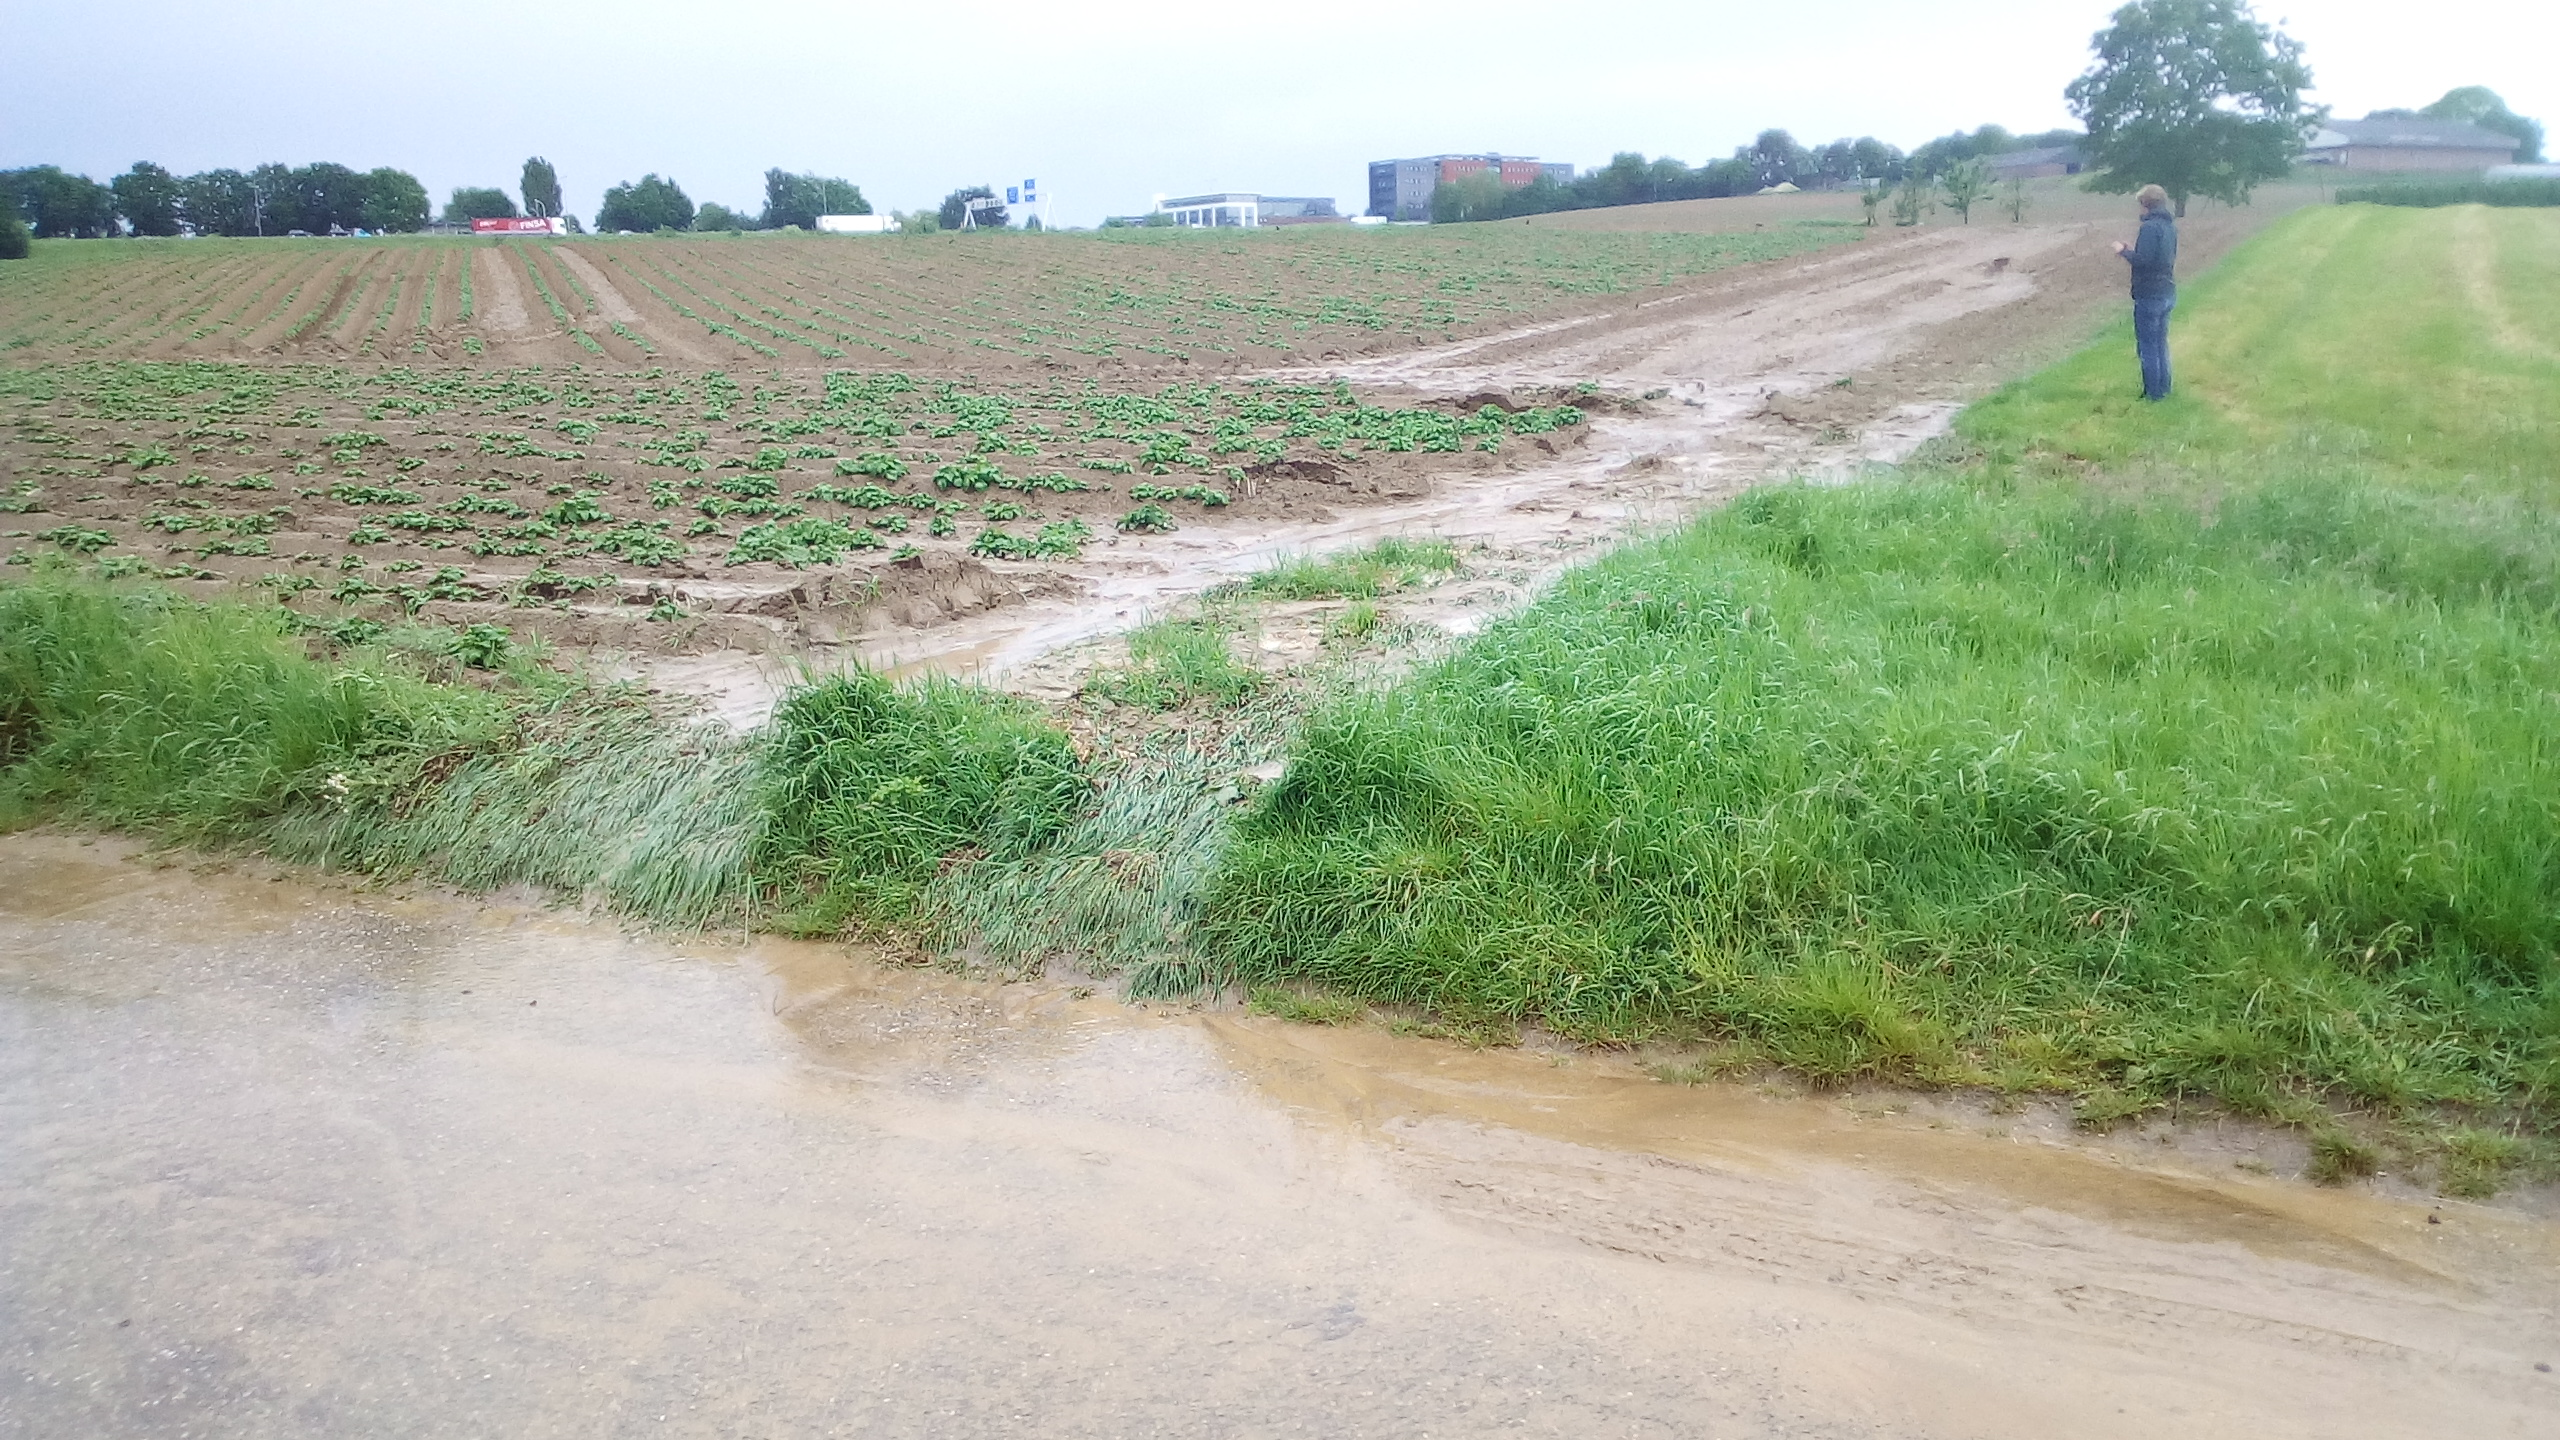


Figure S.5: Photo of the potato field during rainfall event on 28 May 2019. The low crop cover, potato ridges and fine tilled earth combine into a high amount of runoff and associated erosion.

## Land use and pesticide applications

Table S.8: Overview of pesticide applications, and detection for major crops in the catchment for the period 2018 - 2020.

| Field 1 | A | | | B | | | C | | |
| --- | --- | --- | --- | --- | --- | --- | --- | --- | --- |
| Area (ha) | 7.9 | | | 14.1 | | | 5.3 | | |
| Year | 2018 | 2019 | 2020 | 2018 | 2019 | 2020 | 2018 | 2019 | 2020 |
| Crop | Sugar beet | Wheat | Potato | Wheat | Potato | Wheat | Apples | | |
| Number of application days | 8 | 3 | 21 | 3 | 26 | 3 | ?4 | 26 | 20 |
| kg ha-1 y-1 active substances (AS) | 7.4 | 0.4 | 9.1 | 0.4 | 13.0 | 0.3 | ? | 24.9 | 17.5 |
| Number of different AS applied per growing season | 10 | 7 | 14 | 8 | 22 | 7 | ? | 20 | 13 |
| Applied AS analyzed in this study | 3 | 4 | 12 | 4 | 17 | 2 | ? | 12 | 8 |
| Residues detected in soil 2 | -3 | 7 | 13 | - | 25 | 15 | - | 16 | 13 |
| 1 For field locations, see figure 1. 2 Including AMPA, which is a degradation product of glyphosate, not applied, always detected. 3 Not measured. 4 No data obtained for this field/season. AS = active substances. A list with all applied and analyzed AS is presented in Annex A. | | | | | | | | | |

## Relation between discharged AS and applications in the catchment

Table S.9: Detected AS for each event, with concentration in PP, DP and related concentrations and pesticide application data for the fields in the catchment. Note: for the three fields (A, B and C) not on all days field samples were collected. – indicates ‘no measurement’, n.d. indicates ‘measured but not detected’. For days between application and event, 9999 represents AS which do not have a known application on either of the three fields before the date of the event.

|  |  | Observed concentrations in PP, DP and soils | | | | |  |  |  |
| --- | --- | --- | --- | --- | --- | --- | --- | --- | --- |
| Date of event | Active substance | PP  (µg kg-1) | DP  (µg L-1) | Field A  (µg kg-1) | Field B  (µg kg-1) | Field C  (µg kg-1) | Field with last application of AS | Days between application and event | Application rate (g ha-1) |
| 15-03-2019 | Dodine | 0 | 278.5714 | - | - | - | C | 9999 | 500 |
| 15-03-2019 | Bixafen | 0 | 60.88889 | - | - | - | B | 293 | 75 |
| 10-05-2019 | Glyphosate | 0 | 1900 | - | 260 | 19000 | B | 39 | 1440 |
| 10-05-2019 | Prosulfocarb | 0 | 1320 | - | 4200 | 14 | B | 6 | 2800 |
| 10-05-2019 | Metobromuron | 45.7 | 1250 | - | 4900 | - | B | 6 | 1000 |
| 10-05-2019 | Mandipropamid | 0 | 544 | - | - | - | A | 9999 | 150 |
| 10-05-2019 | Metribuzin | 11.22222 | 146.6667 | - | 400 | - | B | 6 | 245 |
| 10-05-2019 | Bixafen | 0 | 70.88889 | 50 | 38 | - | B | 349 | 75 |
| 10-05-2019 | Flutolanil | 0 | 64.3 | - | 25 | 20 | B | 23 | 120 |
| 10-05-2019 | Epoxiconazole | 0 | 40.77778 | 390 | 21 | - | A | 21 | 67.5 |
| 10-05-2019 | Isopyrazam | 0 | 38.88889 | 420 | 21 | - | A | 21 | 93.75 |
| 10-05-2019 | Fluopicolide | 0 | 17.3 | 27 | 9.3 | - | A | 9999 | 75 |
| 28-05-2019 | Prosulfocarb | 0 | 598.6298 | - | 560 | 10 | B | 24 | 2800 |
| 28-05-2019 | AMPA | 0 | 511.8178 | 160 | 130 | 4800 | C | 13 | 900 |
| 28-05-2019 | Glyphosate | 0 | 490.0572 | - | 210 | 7500 | C | 13 | 900 |
| 28-05-2019 | Metobromuron | 34.7125 | 438.6838 | - | 830 | 21 | B | 24 | 1000 |
| 28-05-2019 | Bixafen | 0 | 45.39868 | 42 | 27 | - | B | 367 | 75 |
| 28-05-2019 | Metribuzin | 3.686111 | 45.08512 | - | 65 | - | B | 24 | 245 |
| 28-05-2019 | Isopyrazam | 0 | 24.87465 | 500 | 15 | - | A | 39 | 93.75 |
| 28-05-2019 | Epoxiconazole | 0 | 20.15894 | 410 | 16 | - | A | 39 | 67.5 |
| 28-05-2019 | Flutolanil | 0 | 18.14707 | - | - | 21 | B | 41 | 120 |
| 28-05-2019 | Fluopicolide | 0 | 8.78753 | 27 | 8.1 | - | A | 9999 | 75 |
| 28-05-2019 | Fluxapyroxad | 0 | 0.34425 | - | - | 1500 | C | 10 | 90 |
| 05-06-2019 | Glyphosate | 0 | 641.25 | - | - | - | C | 21 | 900 |
| 05-06-2019 | Bixafen | 0 | 97.77778 | - | - | - | A | 4 | 75 |
| 05-06-2019 | Mandipropamid | 47.7 | 63.3 | - | - | - | B | 2 | 150 |
| 05-06-2019 | Metobromuron | 19.7 | 31.1 | - | - | - | B | 32 | 1000 |
| 05-06-2019 | Boscalid | 0 | 27.2 | - | - | - | C | 9999 | 201.6 |
| 05-06-2019 | Fluopicolide | 0 | 19.3 | - | - | - | A | 9999 | 75 |
| 05-06-2019 | Pyraclostrobin | 0 | 18.66667 | - | - | - | C | 9999 | 102.4 |
| 05-06-2019 | Epoxiconazole | 0 | 16.77778 | - | - | - | A | 47 | 67.5 |
| 05-06-2019 | Prosulfocarb | 0 | 14.3 | - | - | - | B | 32 | 2800 |
| 05-06-2019 | Metribuzin | 5.055556 | 0 | - | - | - | B | 32 | 245 |
| 15-06-2019 | Dimethomorph | 88.66667 | 1300 | - | - | - | B | 1 | 180 |
| 15-06-2019 | Mandipropamid | 17.8 | 953 | - | - | - | B | 3 | 150 |
| 15-06-2019 | AMPA | 0 | 708.75 | - | - | - | C | 31 | 900 |
| 15-06-2019 | Glyphosate | 0 | 540 | - | - | - | C | 31 | 900 |
| 15-06-2019 | Metobromuron | 9.18 | 190 | - | - | - | B | 42 | 1000 |
| 15-06-2019 | Bixafen | 0 | 100.7778 | - | - | - | A | 14 | 75 |
| 15-06-2019 | Prosulfocarb | 0 | 95.2 | - | - | - | B | 42 | 2800 |
| 15-06-2019 | Prothioconazole | 0 | 49.99445 | - | - | - | A | 14 | 150 |
| 15-06-2019 | Epoxiconazole | 0 | 41.55556 | - | - | - | A | 57 | 67.5 |
| 15-06-2019 | Isopyrazam | 0 | 31.22222 | - | - | - | A | 57 | 93.75 |
| 15-06-2019 | Cymoxanil | 0 | 29.9 | - | - | - | B | 1 | 119.25 |
| 15-06-2019 | Thiacloprid | 8.3125 | 27.25 | - | - | - | B | 1 | 120 |
| 15-06-2019 | Metribuzin | 3.655556 | 22.77778 | - | - | - | B | 42 | 245 |
| 15-06-2019 | Fluopicolide | 0 | 12.8 | - | - | - | A | 9999 | 75 |
| 15-06-2019 | Flutolanil | 0 | 9.65 | - | - | - | B | 59 | 120 |
| 18-08-2019 | Difenoconazole | 0 | 443.648 | - | - | - | B | 12 | 125 |
| 18-08-2019 | Fluopicolide | 3.985556 | 267.3668 | - | - | - | B | 3 | 81.25 |
| 18-08-2019 | AMPA | 0 | 262.2928 | - | - | - | C | 50 | 960 |
| 18-08-2019 | Glyphosate | 1.611111 | 130.7034 | - | - | - | C | 50 | 960 |
| 18-08-2019 | Mandipropamid | 0 | 108.8358 | - | - | - | B | 60 | 150 |
| 18-08-2019 | Dimethomorph | 0 | 92.57565 | - | - | - | B | 55 | 180 |
| 18-08-2019 | Propamocarb | 0 | 82.10184 | - | - | - | B | 3 | 812.5 |
| 18-08-2019 | Bixafen | 0 | 44.95693 | - | - | - | A | 78 | 75 |
| 18-08-2019 | Oxathiapiprolin | 0 | 29.55654 | - | - | - | B | 20 | 15 |
| 18-08-2019 | Cyazofamid | 0 | 28.91162 | - | - | - | B | 20 | 80 |
| 18-08-2019 | Metobromuron | 0 | 20.733 | - | - | - | B | 106 | 1000 |
| 18-08-2019 | Epoxiconazole | 0 | 16.50384 | - | - | - | A | 121 | 67.5 |
| 18-08-2019 | Isopyrazam | 0 | 15.76724 | - | - | - | A | 121 | 93.75 |
| 18-08-2019 | Prosulfocarb | 0 | 7.554014 | - | - | - | B | 106 | 2800 |
| 18-08-2019 | Thiacloprid | 0 | 0.515037 | - | - | - | B | 48 | 96 |
| 17-06-2020 | Mandipropamid | 21.56667 | 6979.447 | - | - | - | A | 2 | 150 |
| 17-06-2020 | Metobromuron | 16.83333 | 2209.28 | - | - | - | A | 47 | 1000 |
| 17-06-2020 | Thiacloprid | 15.32292 | 1772.342 | - | - | - | A | 2 | 120 |
| 17-06-2020 | AMPA | 0 | 1537.281 | - | - | - | A | 75 | 2160 |
| 17-06-2020 | Prosulfocarb | 0 | 1358.501 | - | - | - | A | 47 | 2400 |
| 17-06-2020 | Glyphosate | 0 | 1273.802 | - | - | - | A | 75 | 2160 |
| 17-06-2020 | Bixafen | 0 | 99.02882 | - | - | - | A | 382 | 75 |
| 17-06-2020 | Epoxiconazole | 0 | 78.45527 | - | - | - | B | 18 | 75 |
| 17-06-2020 | Metribuzin | 0 | 57.00365 | - | - | - | A | 137 | 180 |
| 17-06-2020 | Fluopicolide | 0.685 | 31.928 | - | - | - | A | 9 | 75 |
| 17-06-2020 | Isopyrazam | 0 | 27.96925 | - | - | - | B | 54 | 93.75 |
| 17-06-2020 | Boscalid | 0 | 27.73557 | - | - | - | C | 270 | 201.6 |
| 17-06-2020 | Difenoconazole | 0 | 20.51582 | - | - | - | B | 316 | 125 |
| 17-06-2020 | Prothioconazole | 0 | 4.847287 | - | - | - | A | 382 | 150 |
| 26-06-2020 | Mandipropamid | 14.9 | 2150 | - | - | - | A | 3 | 100 |
| 26-06-2020 | AMPA | 0 | 1475 | - | - | - | C | 8 | 1080 |
| 26-06-2020 | Glyphosate | 0 | 622.5 | - | - | - | C | 8 | 1080 |
| 26-06-2020 | Metobromuron | 4.05 | 483 | - | - | - | A | 56 | 1000 |
| 26-06-2020 | Prosulfocarb | 0 | 315 | - | - | - | A | 56 | 2400 |
| 26-06-2020 | Cyazofamid | 0 | 131.1111 | - | - | - | A | 7 | 80 |
| 26-06-2020 | Acetamiprid | 6.25 | 105 | - | - | - | A | 3 | 50 |
| 26-06-2020 | Bixafen | 0 | 86.22222 | - | - | - | A | 391 | 75 |
| 26-06-2020 | Thiacloprid | 0 | 82.125 | - | - | - | A | 11 | 120 |
| 26-06-2020 | Oxathiapiprolin | 0 | 61.77778 | - | - | - | B | 333 | 15 |
| 26-06-2020 | Epoxiconazole | 0 | 49.66667 | - | - | - | B | 27 | 75 |
| 26-06-2020 | Metribuzin | 0 | 28.55556 | - | - | - | A | 146 | 180 |
| 26-06-2020 | Fluopicolide | 0 | 27.8 | - | - | - | A | 18 | 75 |
| 26-06-2020 | Boscalid | 0 | 27.6 | - | - | - | C | 279 | 201.6 |
| 26-06-2020 | Difenoconazole | 0 | 27.11111 | - | - | - | B | 325 | 125 |
| 26-06-2020 | Isopyrazam | 0 | 21.33333 | - | - | - | B | 63 | 93.75 |
| 26-06-2020 | Chlorantraniliprole | 0 | 20.88889 | - | - | - | C | 23 | 34 |
| 26-06-2020 | Flonicamid | 0 | 10.41111 | - | - | - | A | 7 | 80 |
| 01-07-2020 | Cyazofamid | 0 | 1877.778 | - | - | - | A | 4 | 80 |
| 01-07-2020 | Mandipropamid | 5.64 | 1750 | - | - | - | A | 8 | 100 |
| 01-07-2020 | AMPA | 0 | 752.5 | - | - | - | C | 13 | 1080 |
| 01-07-2020 | Metobromuron | 0 | 629 | - | - | - | A | 61 | 1000 |
| 01-07-2020 | Glyphosate | 0 | 381.25 | - | - | - | C | 13 | 1080 |
| 01-07-2020 | Prosulfocarb | 0 | 338 | - | - | - | A | 61 | 2400 |
| 01-07-2020 | Thiacloprid | 0 | 113.875 | - | - | - | A | 16 | 120 |
| 01-07-2020 | Bixafen | 0 | 95.22222 | - | - | - | A | 396 | 75 |
| 01-07-2020 | Epoxiconazole | 0 | 68.66667 | - | - | - | B | 32 | 75 |
| 01-07-2020 | Acetamiprid | 0 | 65.6 | - | - | - | A | 8 | 50 |
| 01-07-2020 | Fluopicolide | 0 | 37.8 | - | - | - | A | 23 | 75 |
| 01-07-2020 | Boscalid | 0 | 37.4 | - | - | - | C | 284 | 201.6 |
| 01-07-2020 | Oxathiapiprolin | 0 | 32.88889 | - | - | - | B | 338 | 15 |
| 01-07-2020 | Metribuzin | 0 | 31.55556 | - | - | - | A | 151 | 180 |
| 01-07-2020 | Isopyrazam | 0 | 29.55556 | - | - | - | B | 68 | 93.75 |
| 01-07-2020 | Difenoconazole | 0 | 22.44444 | - | - | - | B | 330 | 125 |
| 01-07-2020 | Flonicamid | 0 | 9.466667 | - | - | - | A | 12 | 80 |
| 11-08-2020 | Mandipropamid | 0 | 767 | 49 | - | - | A | 49 | 100 |
| 11-08-2020 | Thiacloprid | 0 | 166.25 | 32 | 22 | 61 | A | 57 | 120 |
| 11-08-2020 | Metobromuron | 0 | 99.2 | 120 | 35 | - | A | 102 | 1000 |
| 11-08-2020 | Cyazofamid | 0 | 94.33333 | - | - | - | A | 15 | 80 |
| 11-08-2020 | Boscalid | 0 | 89.5 | 19 | 22 | 1600 | C | 325 | 201.6 |
| 11-08-2020 | Difenoconazole | 0 | 85.11111 | 6.6 | 8.7 | 55 | B | 371 | 125 |
| 11-08-2020 | Bixafen | 0 | 53.22222 | 50 | 38 | - | A | 437 | 75 |
| 11-08-2020 | Prosulfocarb | 0 | 51.2 | 28 | 29 | - | A | 102 | 2400 |
| 11-08-2020 | Epoxiconazole | 0 | 43.22222 | 26 | 210 | - | B | 73 | 75 |
| 11-08-2020 | Acetamiprid | 0 | 42.4 | - | - | - | A | 27 | 50 |
| 11-08-2020 | Fluxapyroxad | 0 | 16.44444 | - | - | - | C | 101 | 90 |
| 11-08-2020 | Fluopicolide | 0 | 16 | 18 | 14 | - | A | 64 | 75 |
| 11-08-2020 | Isopyrazam | 0 | 12.66667 | 13 | 240 | - | B | 109 | 93.75 |
| 11-08-2020 | Chlorantraniliprole | 0 | 12.44444 | - | - | 650 | C | 69 | 34 |
| 11-08-2020 | Pyraclostrobin | 0 | 12.22222 | - | - | 56 | C | 325 | 102.4 |
| 12-08-2020 | Mandipropamid | 1.425714 | 817.0375 | 49 | - | - | A | 50 | 100 |
| 12-08-2020 | AMPA | 0 | 724.1339 | 580 | 270 | 6000 | C | 55 | 1080 |
| 12-08-2020 | Thiacloprid | 0 | 320.56 | 32 | 22 | 61 | A | 58 | 120 |
| 12-08-2020 | Glyphosate | 3.785714 | 188.4397 | 96 | 150 | 2900 | C | 55 | 1080 |
| 12-08-2020 | Metobromuron | 0 | 154.7451 | 120 | 35 | - | A | 103 | 1000 |
| 12-08-2020 | Difenoconazole | 0 | 97.54517 | 6.6 | 8.7 | 55 | B | 372 | 125 |
| 12-08-2020 | Cyazofamid | 0 | 89.6213 | - | - | - | A | 16 | 80 |
| 12-08-2020 | Prosulfocarb | 0 | 86.49852 | 28 | 29 | - | A | 103 | 2400 |
| 12-08-2020 | Bixafen | 0 | 79.90027 | 50 | 38 | - | A | 438 | 75 |
| 12-08-2020 | Acetamiprid | 0.795714 | 73.42445 | - | - | - | A | 28 | 50 |
| 12-08-2020 | Epoxiconazole | 0 | 48.81762 | 26 | 210 | - | B | 74 | 75 |
| 12-08-2020 | Boscalid | 0 | 39.00966 | 19 | 22 | 1600 | C | 326 | 201.6 |
| 12-08-2020 | Fluopicolide | 0 | 22.5429 | 18 | 14 | - | A | 65 | 75 |
| 12-08-2020 | Isopyrazam | 0 | 21.00852 | 13 | 240 | - | B | 110 | 93.75 |
| 12-08-2020 | Metribuzin | 0 | 5.866244 | 13 | 7.6 | - | A | 193 | 180 |
| 12-08-2020 | Oxathiapiprolin | 0 | 2.158905 | - | - | - | B | 380 | 15 |
| 16-08-2020 | Mandipropamid | 0.664 | 772.5172 | 49 | - | - | A | 54 | 100 |
| 16-08-2020 | Glyphosate | 0 | 649.9905 | 96 | 150 | 2900 | C | 59 | 1080 |
| 16-08-2020 | AMPA | 0 | 583.2535 | 580 | 270 | 6000 | C | 59 | 1080 |
| 16-08-2020 | Metobromuron | 0 | 166.5444 | 120 | 35 | - | A | 107 | 1000 |
| 16-08-2020 | Thiacloprid | 0 | 64.57195 | 32 | 22 | 61 | A | 62 | 120 |
| 16-08-2020 | Bixafen | 0 | 55.56905 | 50 | 38 | - | A | 442 | 75 |
| 16-08-2020 | Prosulfocarb | 0 | 51.32367 | 28 | 29 | - | A | 107 | 2400 |
| 16-08-2020 | Epoxiconazole | 0 | 32.90758 | 26 | 210 | - | B | 78 | 75 |
| 16-08-2020 | Boscalid | 0 | 21.69577 | 19 | 22 | 1600 | C | 330 | 201.6 |
| 16-08-2020 | Difenoconazole | 0 | 17.114 | 6.6 | 8.7 | 55 | B | 376 | 125 |
| 16-08-2020 | Isopyrazam | 0 | 16.88188 | 13 | 240 | - | B | 114 | 93.75 |
| 16-08-2020 | Fluopicolide | 0 | 16.84253 | 18 | 14 | - | A | 69 | 75 |
| 16-08-2020 | Acetamiprid | 0 | 6.200439 | - | - | - | A | 32 | 50 |
| 16-08-2020 | Cyazofamid | 0 | 4.64837 | - | - | - | A | 20 | 80 |
| 16-08-2020 | Metribuzin | 0 | 2.26968 | 13 | 7.6 | - | A | 197 | 180 |
| 30-08-2020 | Mandipropamid | 0 | 940 | - | - | - | A | 68 | 100 |
| 30-08-2020 | AMPA | 0 | 932.5 | - | - | - | C | 73 | 1080 |
| 30-08-2020 | Metobromuron | 0 | 252 | - | - | - | A | 121 | 1000 |
| 30-08-2020 | Bixafen | 0 | 91.22222 | - | - | - | A | 456 | 75 |
| 30-08-2020 | Thiacloprid | 0 | 74.375 | - | - | - | A | 76 | 120 |
| 30-08-2020 | Prosulfocarb | 0 | 74.2 | - | - | - | A | 121 | 2400 |
| 30-08-2020 | Epoxiconazole | 0 | 53.11111 | - | - | - | B | 92 | 75 |
| 30-08-2020 | Boscalid | 0 | 46.7 | - | - | - | C | 344 | 201.6 |
| 30-08-2020 | Fluopicolide | 0 | 32.5 | - | - | - | A | 83 | 75 |
| 30-08-2020 | Difenoconazole | 0 | 28.66667 | - | - | - | B | 390 | 125 |
| 30-08-2020 | Isopyrazam | 0 | 25.22222 | - | - | - | B | 128 | 93.75 |
| 30-08-2020 | Metribuzin | 0 | 10.11111 | - | - | - | A | 211 | 180 |
| 23-09-2020 | Metobromuron | 0 | 246 | - | - | - | A | 145 | 1000 |
| 23-09-2020 | Mandipropamid | 0 | 113 | - | - | - | A | 92 | 100 |
| 23-09-2020 | Bixafen | 0 | 96.22222 | - | - | - | A | 480 | 75 |
| 23-09-2020 | Isopyrazam | 0 | 42.44444 | - | - | - | B | 152 | 93.75 |
| 23-09-2020 | Epoxiconazole | 0 | 41 | - | - | - | B | 116 | 75 |
| 23-09-2020 | Metribuzin | 0 | 26.33333 | - | - | - | A | 235 | 180 |
| 23-09-2020 | Prothioconazole | 0 | 24.75215 | - | - | - | A | 480 | 150 |
| 23-09-2020 | Fluopicolide | 0 | 18.7 | - | - | - | A | 107 | 75 |
| 23-09-2020 | Flutolanil | 0 | 17.7 | - | - | - | B | 525 | 120 |
| 26-09-2020 | Mandipropamid | 0 | 81.5 | - | - | - | A | 95 | 100 |
| 26-09-2020 | Bixafen | 0 | 59.66667 | - | - | - | A | 483 | 75 |
| 26-09-2020 | Metobromuron | 0 | 47.4 | - | - | - | A | 148 | 1000 |
| 26-09-2020 | Epoxiconazole | 0 | 34.11111 | - | - | - | B | 119 | 75 |
| 26-09-2020 | Boscalid | 0 | 27.6 | - | - | - | C | 371 | 201.6 |
| 26-09-2020 | Fluopicolide | 0 | 26 | - | - | - | A | 110 | 75 |
| 26-09-2020 | Difenoconazole | 0 | 20.33333 | - | - | - | B | 417 | 125 |
| 26-09-2020 | Prosulfocarb | 0 | 17.4 | - | - | - | A | 148 | 2400 |
| 08-10-2020 | Mandipropamid | 0 | 120 | - | - | - | A | 107 | 100 |
| 08-10-2020 | Bixafen | 0 | 86 | - | - | - | A | 495 | 75 |
| 08-10-2020 | Metobromuron | 0 | 48.9 | - | - | - | A | 160 | 1000 |
| 08-10-2020 | Epoxiconazole | 0 | 41.22222 | - | - | - | B | 131 | 75 |
| 08-10-2020 | Boscalid | 0 | 36.6 | - | - | - | C | 383 | 201.6 |
| 08-10-2020 | Fluopicolide | 0 | 31.9 | - | - | - | A | 122 | 75 |
| 08-10-2020 | Prosulfocarb | 0 | 21.7 | - | - | - | A | 160 | 2400 |
| 08-10-2020 | Isopyrazam | 0 | 17.77778 | - | - | - | B | 167 | 93.75 |
| 08-10-2020 | Difenoconazole | 0 | 9.8 | - | - | - | B | 429 | 125 |
| 22-10-2020 | Mandipropamid | 0 | 142.0499 | - | - | - | A | 121 | 100 |
| 22-10-2020 | Bixafen | 0 | 90.70985 | - | - | - | A | 509 | 75 |
| 22-10-2020 | Epoxiconazole | 0 | 43.90611 | - | - | - | B | 145 | 75 |
| 22-10-2020 | Boscalid | 0 | 43.28119 | - | - | - | C | 397 | 201.6 |
| 22-10-2020 | Metobromuron | 0 | 40.57894 | - | - | - | A | 174 | 1000 |
| 22-10-2020 | Fluopicolide | 0 | 33.88867 | - | - | - | A | 136 | 75 |
| 22-10-2020 | Prosulfocarb | 0 | 23.02272 | - | - | - | A | 174 | 2400 |
| 22-10-2020 | Isopyrazam | 0 | 21.12437 | - | - | - | B | 181 | 93.75 |

# References

Anastassiades, Michelangelo, Steven J. Lehotay, Darinka Štajnbaher, and Frank J. Schenck. 2003. “Fast and Easy Multiresidue Method Employing Acetonitrile Extraction/Partitioning and ‘Dispersive Solid-Phase Extraction’ for the Determination of Pesticide Residues in Produce.” *Journal of AOAC International* 86 (2): 412–31. https://doi.org/10.1093/jaoac/86.2.412.

Baartman, Jantiene E.M., Arnaud J.A.M. Temme, Tom Veldkamp, Victor G. Jetten, and Jeroen M. Schoorl. 2013. “Exploring the Role of Rainfall Variability and Extreme Events in Long-Term Landscape Development.” *Catena* 109 (October): 25–38. https://doi.org/10.1016/j.catena.2013.05.003.

Bos, M.G. G. 1989. *Discharge Measurement Structures*. *DELFT, THE NETHERLANDS, DELFT HYDRAUL. LAB., MAY 1976*. 3rd ed. ILRI. https://doi.org/10.1201/9781315141343-2.

Boxall, Alistair BA, Lindsay A. Fogg, Roman Ashauer, Teresa Bowles, Chris J Sinclair, Alison Colyer, and Richard A Brain. 2013. “Effects of Repeated Pulsed Herbicide Exposures on the Growth of Aquatic Macrophytes.” *Environmental Toxicology and Chemistry* 32 (1): 193–200. https://doi.org/10.1002/etc.2040.

Eads, Rand E., and Robert B. Thomas. 1983. “Evaluation of a Depth Proportional Intake Device for Automatic Pumping Samplers.” *JAWRA Journal of the American Water Resources Association* 19 (2): 289–92. https://doi.org/10.1111/j.1752-1688.1983.tb05328.x.

Gettel, Melissa, John S. Gulliver, Masoud Kayhanian, Gregory Degroot, Joshua Brand, Omid Mohseni, and Andrew J. Erickson. 2011. “Improving Suspended Sediment Measurements by Automatic Samplers.” *Journal of Environmental Monitoring* 13 (10): 2703–9. https://doi.org/10.1039/c1em10258c.

Griffin, James L., and Seth M. Dabney. 1990. “Preplant-Postemergence Herbicides for Legume Cover-Crop Control in Minimum Tillage Systems.” *Weed Technology* 4 (2): 332–36. https://doi.org/10.1017/s0890037x00025495.

Hamer, Mick, Samuel K. Maynard, and Suzanne Schneider. 2019. “A Pulsed-Dose Study Evaluating Chronic Toxicity of Chlorothalonil to Fish: A Case Study for Environmental Risk Assessment.” *Environmental Toxicology and Chemistry* 38 (7): 1549–59. https://doi.org/10.1002/etc.4421.

Mol, Hans G.J., Patricia Plaza-Bolaños, Paul Zomer, Theo C. De Rijk, Alida A.M. Stolker, and Patrick P.J. Mulder. 2008. “Toward a Generic Extraction Method for Simultaneous Determination of Pesticides, Mycotoxins, Plant Toxins, and Veterinary Drugs in Feed and Food Matrixes.” *Analytical Chemistry* 80 (24): 9450–59. https://doi.org/10.1021/ac801557f.

Moser, Andreas, Devon Wemyss, Ruth Scheidegger, Fabrizio Fenicia, Mark Honti, and Christian Stamm. 2018. “Modelling Biocide and Herbicide Concentrations in Catchments of the Rhine Basin.” *Hydrology and Earth System Sciences* 22 (8): 4229–49. https://doi.org/10.5194/hess-22-4229-2018.

Parkin, DA, WD King, and DE Shaw. 1982. “An Automatic Raingauge Network for a Cloud Seeding Experiment.” https://publications.csiro.au/rpr/pub?list=BRO&pid=procite:00333298-acfb-45d2-81d7-a022c68de3f4.

Parshall, Ralph L. 1926. “The Improved Venturi Flume.” *Transactions of the American Society of Civil Engineers* 89 (1): 841–51. https://doi.org/10.1061/taceat.0003626.

Reichenberger, Stefan, Martin Bach, Adrian Skitschak, and Hans Georg Frede. 2007. “Mitigation Strategies to Reduce Pesticide Inputs into Ground- and Surface Water and Their Effectiveness; A Review.” *Science of the Total Environment* 384 (1–3): 1–35. https://doi.org/10.1016/j.scitotenv.2007.04.046.

Schappert, Alexandra, Miriam H Messelhäuser, Marcus Saile, Gerassimos G Peteinatos, and Roland Gerhards. 2018. “Weed Suppressive Ability of Cover Crop Mixtures Compared to Repeated Stubble Tillage and Glyphosate Treatments.” *Agriculture (Switzerland)* 8 (9). https://doi.org/10.3390/agriculture8090144.

Syafrudin, Muhammad, Risky Ayu Kristanti, Adhi Yuniarto, Tony Hadibarata, Jongtae Rhee, Wedad A. Al-Onazi, Tahani Saad Algarni, Abdulhadi H. Almarri, and Amal M. Al-Mohaimeed. 2021. “Pesticides in Drinking Water—A Review.” *International Journal of Environmental Research and Public Health 2021, Vol. 18, Page 468* 18 (2): 468. https://doi.org/10.3390/IJERPH18020468.

Taylor, John R., and William Thompson. 1998. “An Introduction to Error Analysis: The Study of Uncertainties in Physical Measurements.” *Physics Today* 51 (1): 57–58. https://doi.org/10.1063/1.882103.

Wenneker, M, W H J Beltman, H A E De Werd, M G Van Zeeland, A Van Der Lans, and R Y Van Der Weide. 2010. “Quantifying Point Source Entries of Pesticides in Surface Waters. International Advances in Pesticide Application.” *Library.Wur.Nl* 99. https://library.wur.nl/WebQuery/wurpubs/390304.
